# Supplementary material for: Pulmonary Toxicity Assessment after a Single Intratracheal Inhalation of Chlorhexidine Aerosol in Mice
Source: MDPI journal article supplement (doi:10.3390/toxics11110910), 2023-11-07
Supplement: s1 [file s1]

# **Pulmonary Toxicity Assessment after a Single Intratracheal Inhalation of Chlorhexidine Aerosol in Mice**

Jianzhong Zhang<sup>1,2 †</sup>, Xinmin Jiang<sup>1,2 †</sup>, Xin Li<sup>2</sup>, He Sun<sup>2</sup>, Mingyue Wang<sup>2</sup>,  
Wanjun Zhang<sup>2</sup>, Haonan Li<sup>2</sup>, Hongmei Wang<sup>3</sup>, Min Zhuang<sup>3</sup>, Lin Zhang<sup>1,2</sup>,  
Lin Lu<sup>1,2 \*</sup>, Jinglong Tang<sup>1,2 \*</sup>

<sup>1</sup> Shandong Provincial Maternal and Child Health Care Hospital Affiliated to Qingdao University, Jinan 250001, China

<sup>2</sup> Department of Environmental and Occupational Health, School of Public Health, Qingdao University, Qingdao 266071, China

<sup>3</sup> Department of Respiratory Medicine, Affiliated Hospital of Medical College of Qingdao University, Qingdao 266021, China

\* Correspondence: lulin163@126.com (L.L.); tangjinglong@qdu.edu.cn (J.T.)

<sup>†</sup> These authors contributed equally to this work

## **Summary of Supporting Information**

### **Materials and methods:**

#### **ELISA**

According to the protocol of the ELISA kit, the levels of Hydroxyproline in BALF of the control group and CHG exposure group were detected. Hydroxyproline (CSB-E08839m) ELISA kits were purchased from CUSABIO (Wuhan, <https://www.cusabio.com/>, China). Briefly, add 100  $\mu$ l of standard and sample to be tested into the wells respectively, mix well, put on the plate sticker, incubate at 37 °C for two hours, discard the liquid in the wells, add 100  $\mu$ l of biotin labelling antibody working solution, put on the plate sticker, incubate at 37 °C for one hour, discard the liquid in the wells. Wash three times with 200  $\mu$ l washing solution, 2 minutes each, and shake dry. Add 100  $\mu$ l of horseradish peroxidase labelled affinity protein working solution to each well, affix the plate sticker and incubate at 37 °C for one hour. Discard the liquid in the wells, wash with 200  $\mu$ l of washing solution five times, two each time and shake dry. Add 90  $\mu$ l of the substrate solution, develop the color at 37 °C for 15-30min, add 50  $\mu$ l of termination solution, measure the optical density (OD) at 450 nm after 5 min, and calculate the concentration of each well. Samples from three animals per group were measured to derive the Mean  $\pm$  SD.

## Supplemental Tables and Figures:

Table S1. Primer sequences for mouse samples used in qPCR (5' to 3').

| Gene           | Forward Primer (5'-3')  | Reverse Primer (5'-3')  |
|----------------|-------------------------|-------------------------|
| <i>Muc5ac</i>  | TCTACTGACTGCACCAACACA   | TCCGTCAGTCCACACTTTCG    |
| <i>Muc5b</i>   | CTGAAGACCTGTCGGAACCCAA  | GCCACACACTTCATCTGGTCCT  |
| <i>P4ha3</i>   | TGCAAGTGGAGTACCGCATCAG  | CACCTGGAGATACTCTGCGTAG  |
| <i>Bpifa1</i>  | GGTCTTGTGCAGAGTCCTGATG  | CTTTCACGGCTAAGACTTCTGCA |
| <i>Bpifb1</i>  | CAGGCACTGAAGGACCATGATG  | GGATGTTAGCAGAGGTGACCTTC |
| <i>β-actin</i> | CATTGCTGACAGGATGCAGAAGG | TGCTGGAAGGTGGACAGTGAGG  |

Table S2. Mortality of chlorhexidine-exposed mice at different concentrations

| Dose (%) | Death | Alive | Total | Mortality (%) |
|----------|-------|-------|-------|---------------|
| 0        | 0     | 13    | 13    | 0             |
| 0.125    | 0     | 12    | 12    | 0             |
| 0.25     | 9     | 19    | 28    | 32.1          |
| 0.5      | 12    | 16    | 28    | 42.9          |
| 1        | 7     | 3     | 10    | 70.0          |

Table S3. Percentage of inflammatory cells in bronchoalveolar lavage fluid

| Group   | Macrophages | Lymphocytes | Neutrophils |
|---------|-------------|-------------|-------------|
| Control | 89.72±1.12  | 9.51±1.21   | 0.78±0.31   |
| 0.125%  | 88.35±1.14  | 10.68±0.65  | 0.97±0.82   |
| 0.25%   | 85.21±1.42* | 13.11±1.21* | 1.68±0.53   |
| 0.5%    | 85.61±1.58* | 13.54±1.67* | 0.85±0.12   |

\* $P < 0.05$ , compared with control group.

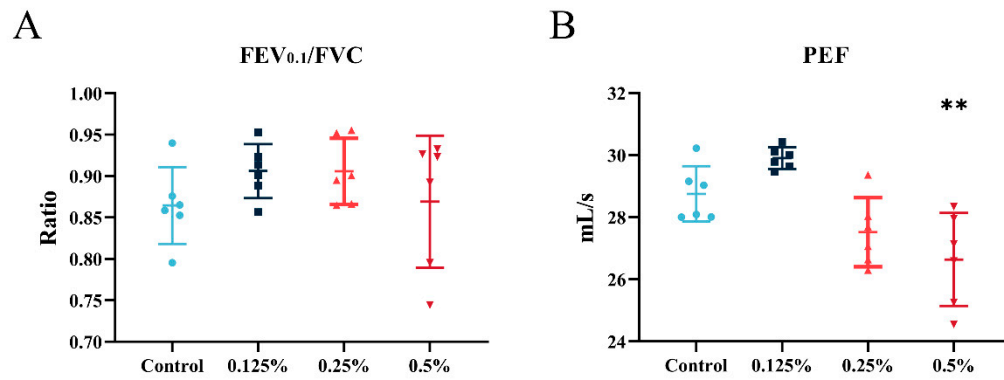

Figure S1. Chlorhexidine decreased pulmonary function in mice. (A) FVE<sub>0.1</sub>/FVC and (B) Peak expiratory flows (PEF) were measured using a NPFE model via the flexiVent FX system. Data were analyzed by one-way ANOVA with Dunnett's post-hoc test (\*\*  $P < 0.01$ ).

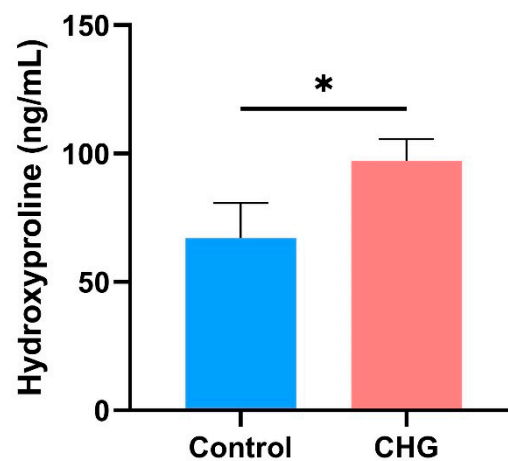

Figure S2. ELISA detection of hydroxyproline in BALF of control and CHG exposure groups. Data are presented as mean  $\pm$  SD ( $n = 3$ , \*  $P < 0.05$ ).
